# Supplementary material for: Identification of Fungal Pathogens to Control Postharvest Passion Fruit (Passiflora edulis) Decays and Multi-Omics Comparative Pathway Analysis Reveals Purple Is More Resistant to Pathogens than a Yellow Cultivar
Source: MDPI journal article supplement (doi:10.3390/jof7100879), 2021-10-19
Supplement: s1 [file s1]

## Supplementary Material

# Identification of fungal pathogens to control postharvest passion fruit (*Passiflora edulis*) decays and multi-omics comparative pathway analysis reveals purple is more resistant to pathogens than a yellow cultivar

Hafiz Muhammad Rizwan<sup>1</sup>, Lin Zhimin<sup>2</sup>, Wiwiek Harsonowati<sup>3</sup>, Abdul Waheed<sup>4</sup>, Yang Qiang<sup>1</sup>, Ahmed Fathy Yousef<sup>1,5</sup>, Nigarish Munir<sup>1</sup>, Xiaoxia Wei<sup>6</sup>, Sandra S Scholz<sup>7</sup>, Michael Reichelt<sup>8</sup>, Ralf Oelmüller<sup>1,7</sup>, Faxing Chen<sup>1,\*</sup>

\*Correspondence: [fxchen@fafu.edu.cn](mailto:fxchen@fafu.edu.cn)

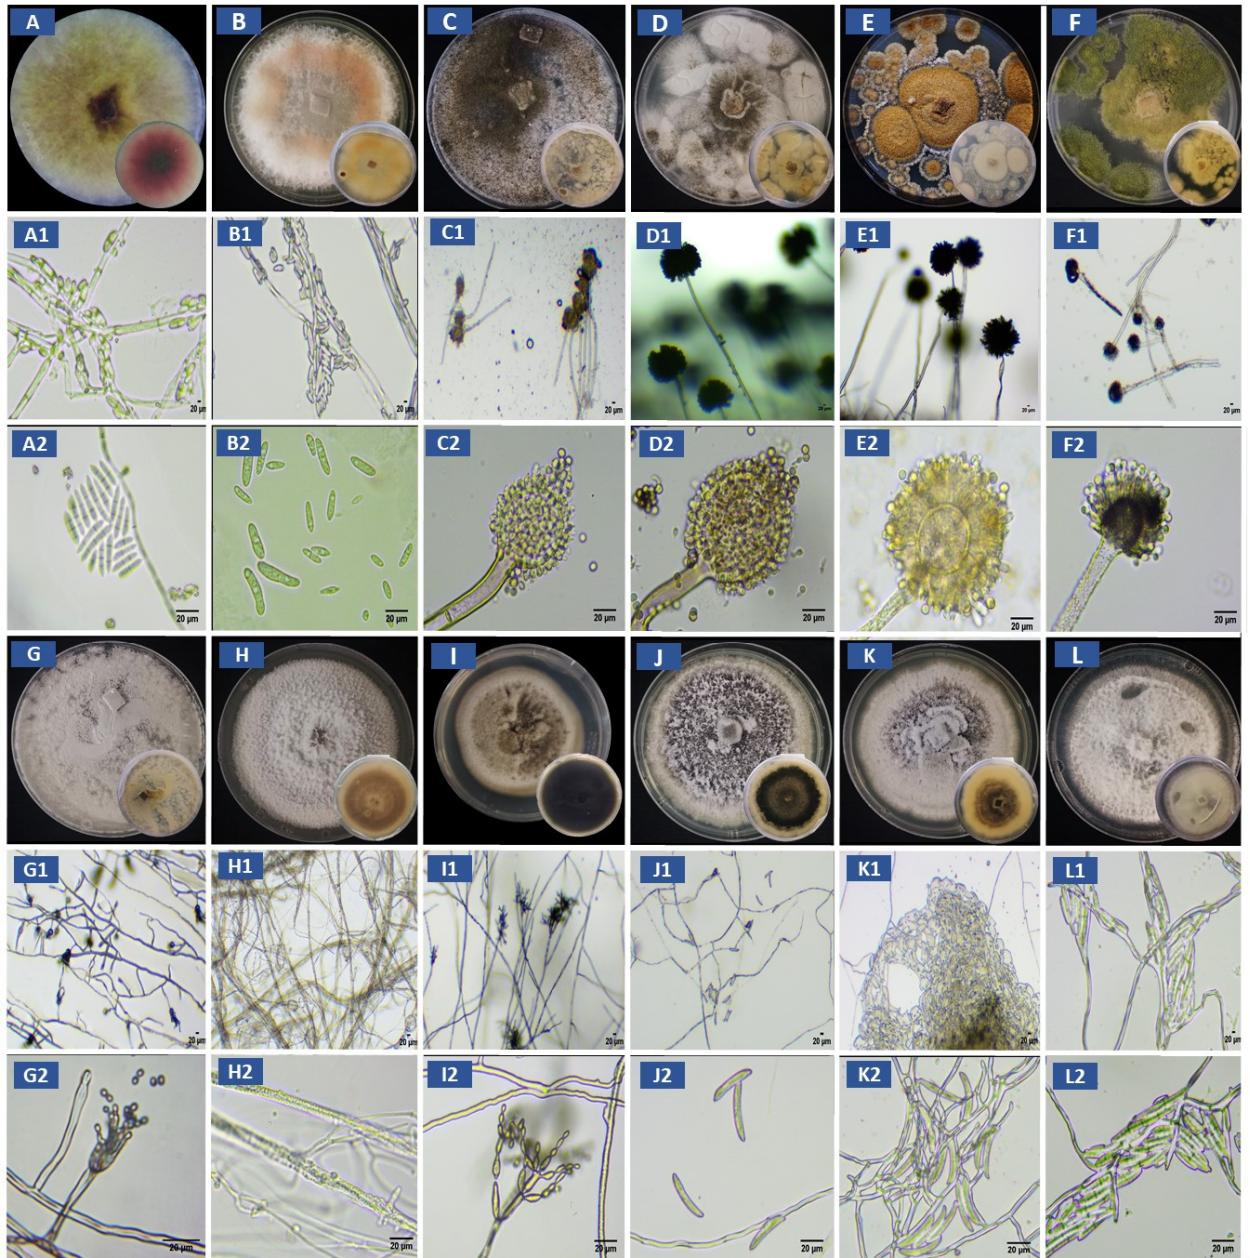

Figure S1. Continue to next page....



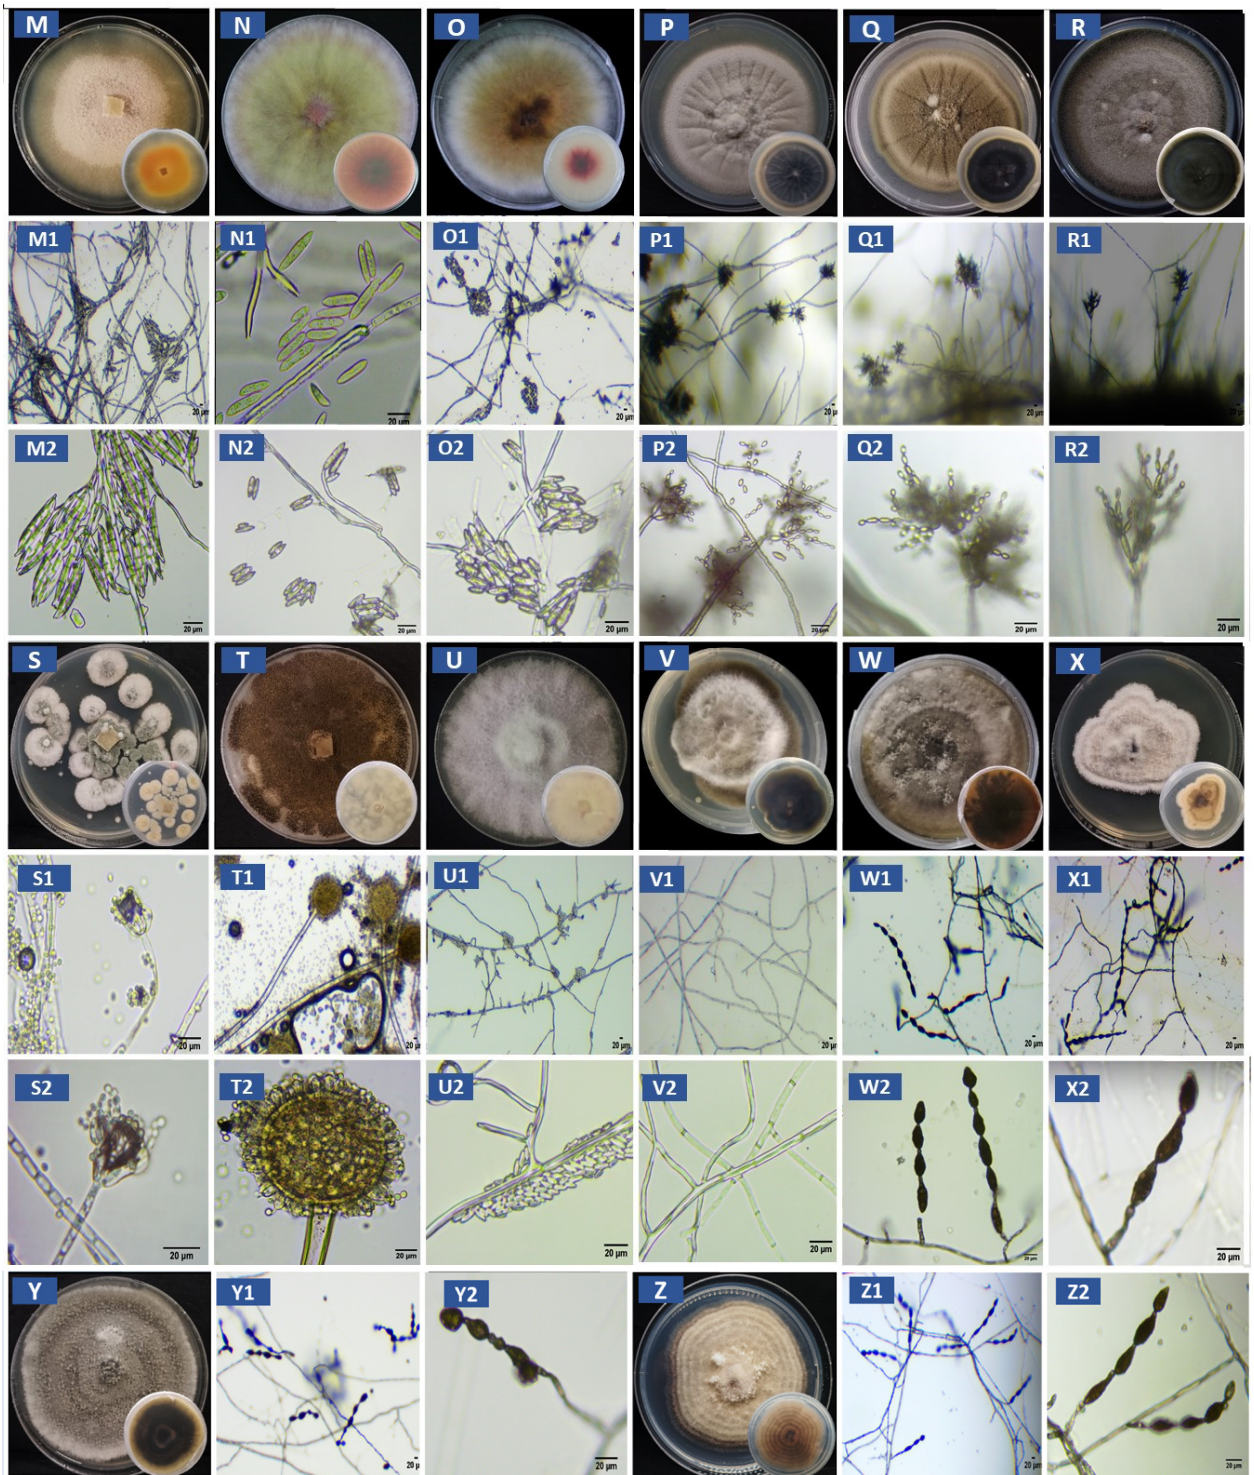

**Figure. S1: Morphological characterization of the 26 isolates collected from passionfruit postharvest rot grew on potato dextrose agar (PDA) for 10 days. Characteristics of colony morphology on PDA (A-Z), thread like structure showing hyphae and mycelium (a1-z1) conidia (a2-z2).** Following are the isolates details A, a1 & a2= YPF-1 (*Fusarium kyushuense*); B, b1 & b2 = YPF-2 (*Fusarium concentricum*); C, c1 & c2 = YPF-3 (*Aspergillus aculeatus*); D, d1 & d2 = YPF-4 (*Aspergillus aculeatus*); E, e1 & e2= YPF-5 (*Aspergillus europaeus*); F, f1 & f2= YPF-6 (*Aspergillus flavus*); G, g1 & g2= YPF-7 (*Penicillium chermesinum*); H, h1 & h2 = YPF-8 (*Microdochium phragmitis*); I, i1 & i2 = YPF-9 (*Cladosporium tenuissimum*); J, j1 & j2= YPF-10 (*Colletotrichum truncatum*); K, k1 & k2 = YPF-11 (*Colletotrichum truncatum*); L, l1 & l2= YPF-12 (*Fusarium concentricum*); M, m1 & m2 = YPF-13 (*Fusarium equiseti*); N, n1 & n2= PPF-1 (*Fusarium kyushuense*); O, o1 & o2= PPF-2 (*Fusarium kyushuense*); P, p1 & p2= PPF-3 (*Cladosporium tenuissimum*); Q, q1 & q2= PPF-4 (*Cladosporium tenuissimum*); R, r1 & r2 = PPF-5 (*Cladosporium tenuissimum*); S, s1 & s2= PPF-6 (*Penicillium paxilli*); T, t1 & t2= PPF-7 (*Aspergillus aculeatus*); U, u1 & u2= PPF-8 (*Fusarium concentricum*); V, v1 & v2= PPF-9 (*Alternaria alternata*), W, w1 & w2= PPF-10 (*Alternaria alternata*); X, x1 & x2= PPF-11 (*Alternaria alternata*); Y, y1 & y2= PPF-12 (*Alternaria alternata*); Z, z1 & z2= PPF-13 (*Alternaria alternata*); (bar = 20µm).

**Table S1.** GenBank accession numbers of sequences used for phylogenetic analyses.

| Sr. | Genus                 | Species               | Voucher/Strain | SSU+ITS+LSU |
|-----|-----------------------|-----------------------|----------------|-------------|
| 1   | <i>Fusarium</i>       | <i>kyushuense</i>     | S8             | MH892849    |
| 2   | <i>Fusarium</i>       | <i>kyushuense</i>     | WZ-201         | MN856334    |
| 3   | <i>Fusarium</i>       | <i>equiseti</i>       | 6mpc           | HM060593    |
| 4   | <i>Fusarium</i>       | <i>equiseti</i>       | JG22           | KJ412501    |
| 5   | <i>Fusarium</i>       | <i>incarnatum</i>     | PaB-3          | MN6462580   |
| 6   | <i>Fusarium</i>       | <i>oxysporum</i>      | MAFF 744009    | DQ452448    |
| 7   | <i>Fusarium</i>       | <i>redolensene</i>    | -              | HQ443207    |
| 8   | <i>Fusarium</i>       | <i>concentricum</i>   | GF-6           | MT940455    |
| 9   | <i>Fusarium</i>       | <i>concentricum</i>   | F2             | HQ379633    |
| 10  | <i>Fusarium</i>       | <i>concentricum</i>   | F21            | HQ379647    |
| 11  | <i>Colletotrichum</i> | <i>queenslandicum</i> | BRIP 57981a    | KF877315    |
| 12  | <i>Colletotrichum</i> | <i>brasiliense</i>    | CBS:128528     | JQ005234    |
| 13  | <i>Colletotrichum</i> | <i>truncatum</i>      | C-82           | KY399773    |
| 14  | <i>Colletotrichum</i> | <i>truncatum</i>      | OCC69          | KP743405    |
| 15  | <i>Colletotrichum</i> | <i>truncatum</i>      | OCC98          | KP743406    |
| 16  | <i>Microdochium</i>   | <i>phragmitis</i>     | GBC-Fungus 115 | MN077485    |
| 17  | <i>Microdochium</i>   | <i>phragmitis</i>     | SL2-5A         | MN328308    |
| 18  | <i>Cladosporium</i>   | <i>tenuissimum</i>    | COAD           | MH682173    |
| 19  | <i>Cladosporium</i>   | <i>tenuissimum</i>    | CBS 262.80     | HM148201    |
| 20  | <i>Cladosporium</i>   | <i>tenuissimum</i>    | HLGM02         | MN005091    |
| 21  | <i>Aspergillus</i>    | <i>aculeatus</i>      | UASWS0464      | HQ166575    |
| 22  | <i>Penicillium</i>    | <i>chermesinum</i>    | NOU279         | MN220649    |
| 23  | <i>Penicillium</i>    | <i>chermesinum</i>    | CMV011D8       | MK450679    |
| 24  | <i>Penicillium</i>    | <i>paxilli</i>        | PP12           | FJ884120    |
| 25  | <i>Penicillium</i>    | <i>paxilli</i>        | A71            | DQ480346    |
| 26  | <i>Aspergillus</i>    | <i>europaeus</i>      | SM03           | MW145184    |
| 27  | <i>Aspergillus</i>    | <i>europaeus</i>      | -              | FR727118    |
| 28  | <i>Aspergillus</i>    | <i>flavus</i>         | GFRS16         | MT447484    |
| 29  | <i>Aspergillus</i>    | <i>flavus</i>         | EF 544         | MT529193    |
| 30  | <i>Alternaria</i>     | <i>alternata</i>      | m110801-3-3    | KC816019    |
| 31  | <i>Alternaria</i>     | <i>alternata</i>      | CATAS-AA01     | GQ169766    |
| 32  | <i>Alternaria</i>     | <i>alternata</i>      | CBS 630.93     | KJ718210    |
| 33  | <i>Alternaria</i>     | <i>alternata</i>      | PaF-3          | MN646267    |
| 34  | <i>Ganoderma</i>      | <i>boninense</i>      | GB001          | KX092000    |

**Table S2.** Number of DEGs of all genes for the annotated pathways in the peels of the fruits of the purple and yellow passion fruit cultivars.

| Pathway                                             | ID             | DEG        | all genes  |
|-----------------------------------------------------|----------------|------------|------------|
| Carbon metabolism                                   | ko01200        | 169        | 458        |
| Biosynthesis of amino acids                         | ko01230        | 164        | 417        |
| <b>Plant hormone signal transduction</b>            | <b>ko04075</b> | <b>127</b> | <b>323</b> |
| Starch and sucrose metabolism                       | ko00500        | 111        | 285        |
| Protein processing in endoplasmic reticulum         | ko04141        | 107        | 275        |
| Spliceosome                                         | ko03040        | 106        | 247        |
| Endocytosis                                         | ko04144        | 104        | 249        |
| Ribosome                                            | ko03010        | 88         | 376        |
| Purine metabolism                                   | ko00230        | 82         | 263        |
| RNA transport                                       | ko03013        | 81         | 261        |
| Glycolysis / Gluconeogenesis                        | ko00010        | 77         | 202        |
| Plant-pathogen interaction                          | ko04626        | 77         | 197        |
| Phenylpropanoid biosynthesis                        | ko00940        | 72         | 142        |
| Cysteine and methionine metabolism                  | ko00270        | 70         | 164        |
| Ubiquitin mediated proteolysis                      | ko04120        | 68         | 175        |
| Peroxisome                                          | ko04146        | 68         | 164        |
| Amino sugar and nucleotide sugar metabolism         | ko00520        | 63         | 194        |
| RNA degradation                                     | ko03018        | 63         | 166        |
| Pyrimidine metabolism                               | ko00240        | 61         | 195        |
| mRNA surveillance pathway                           | ko03015        | 57         | 187        |
| Pyruvate metabolism                                 | ko00620        | 57         | 149        |
| Carbon fixation in photosynthetic organisms         | ko00710        | 53         | 107        |
| Fatty acid metabolism                               | ko01212        | 53         | 157        |
| Phagosome                                           | ko04145        | 52         | 132        |
| Glyoxylate and dicarboxylate metabolism             | ko00630        | 52         | 127        |
| Oxidative phosphorylation                           | ko00190        | 50         | 205        |
| Glycine, serine and threonine metabolism            | ko00260        | 49         | 126        |
| Glycerophospholipid metabolism                      | ko00564        | 48         | 141        |
| Glutathione metabolism                              | ko00480        | 45         | 116        |
| alpha-Linolenic acid metabolism                     | ko00592        | 45         | 97         |
| 2-Oxocarboxylic acid metabolism                     | ko01210        | 43         | 110        |
| Glycerolipid metabolism                             | ko00561        | 42         | 103        |
| Fatty acid degradation                              | ko00071        | 42         | 103        |
| Phenylalanine metabolism                            | ko00360        | 41         | 70         |
| Citrate cycle                                       | ko00020        | 40         | 104        |
| Valine, leucine and isoleucine degradation          | ko00280        | 39         | 98         |
| Phosphatidylinositol signaling system               | ko04070        | 38         | 89         |
| Ribosome biogenesis                                 | ko03008        | 37         | 110        |
| Phenylalanine, tyrosine and tryptophan biosynthesis | ko00400        | 37         | 77         |
| Inositol phosphate metabolism                       | ko00562        | 37         | 94         |
| beta-Alanine metabolism                             | ko00410        | 36         | 84         |
| Cyanoamino acid metabolism                          | ko00460        | 35         | 68         |
| Arginine and proline metabolism                     | ko00330        | 35         | 92         |
| Terpenoid backbone biosynthesis                     | ko00900        | 34         | 84         |
| Alanine, aspartate and glutamate metabolism         | ko00250        | 33         | 89         |
| Aminoacyl-tRNA biosynthesis                         | ko00970        | 33         | 112        |
| Sulfur metabolism                                   | ko00920        | 32         | 69         |
| Nucleotide excision repair                          | ko03420        | 32         | 95         |
| Pentose and glucuronate interconversions            | ko00040        | 32         | 77         |
| Galactose metabolism                                | ko00052        | 32         | 79         |
| Tyrosine metabolism                                 | ko00350        | 32         | 63         |

|                                                        |                |           |           |
|--------------------------------------------------------|----------------|-----------|-----------|
| Pentose phosphate pathway                              | ko00030        | 32        | 89        |
| Ubiquinone and other terpenoid-quinone biosynthesis    | ko00130        | 30        | 61        |
| Propanoate metabolism                                  | ko00640        | 29        | 73        |
| Porphyrin and chlorophyll metabolism                   | ko00860        | 28        | 74        |
| Arginine biosynthesis                                  | ko00220        | 28        | 75        |
| N-Glycan biosynthesis                                  | ko00510        | 27        | 73        |
| Proteasome                                             | ko03050        | 27        | 85        |
| Basal transcription factors                            | ko03022        | 27        | 66        |
| Fatty acid biosynthesis                                | ko00061        | 26        | 73        |
| Ascorbate and aldarate metabolism                      | ko00053        | 25        | 59        |
| Photosynthesis                                         | ko00195        | 25        | 61        |
| Fructose and mannose metabolism                        | ko00051        | 25        | 80        |
| Circadian rhythm - plant                               | ko04712        | 25        | 59        |
| Protein export                                         | ko03060        | 25        | 79        |
| Regulation of autophagy                                | ko04140        | 24        | 57        |
| Nitrogen metabolism                                    | ko00910        | 23        | 56        |
| Biosynthesis of unsaturated fatty acids                | ko01040        | 23        | 80        |
| Pantothenate and CoA biosynthesis                      | ko00770        | 22        | 56        |
| <b>Flavonoid biosynthesis</b>                          | <b>ko00941</b> | <b>22</b> | <b>29</b> |
| Tropane, piperidine and pyridine alkaloid biosynthesis | ko00960        | 20        | 44        |
| DNA replication                                        | ko03030        | 20        | 69        |
| Sphingolipid metabolism                                | ko00600        | 20        | 51        |
| Homologous recombination                               | ko03440        | 20        | 69        |
| Steroid biosynthesis                                   | ko00100        | 19        | 41        |
| Other glycan degradation                               | ko00511        | 19        | 46        |
| Tryptophan metabolism                                  | ko00380        | 19        | 50        |
| Base excision repair                                   | ko03410        | 19        | 60        |
| Carotenoid biosynthesis                                | ko00906        | 19        | 39        |
| Lysine degradation                                     | ko00310        | 18        | 52        |
| SNARE interactions in vesicular transport              | ko04130        | 18        | 53        |
| RNA polymerase                                         | ko03020        | 18        | 67        |
| Isoquinoline alkaloid biosynthesis                     | ko00950        | 16        | 31        |
| Mismatch repair                                        | ko03430        | 16        | 55        |
| Valine, leucine and isoleucine biosynthesis            | ko00290        | 16        | 36        |
| ABC transporters                                       | ko02010        | 16        | 43        |
| Linoleic acid metabolism                               | ko00591        | 15        | 29        |
| Fatty acid elongation                                  | ko00062        | 15        | 37        |
| Histidine metabolism                                   | ko00340        | 14        | 37        |
| Selenocompound metabolism                              | ko00450        | 14        | 33        |
| Nicotinate and nicotinamide metabolism                 | ko00760        | 14        | 40        |
| Ether lipid metabolism                                 | ko00565        | 12        | 41        |
| Taurine and hypotaurine metabolism                     | ko00430        | 11        | 21        |
| Stilbenoid, diarylheptanoid and gingerol biosynthesis  | ko00945        | 11        | 17        |
| Glycosylphosphatidylinositol(GPI)-anchor biosynthesis  | ko00563        | 11        | 33        |
| Diterpenoid biosynthesis                               | ko00904        | 11        | 25        |
| Brassinosteroid biosynthesis                           | ko00905        | 11        | 20        |
| Monoterpenoid biosynthesis                             | ko00902        | 8         | 13        |
| Sesquiterpenoid and triterpenoid biosynthesis          | ko00909        | 6         | 11        |
| Cutin, suberine and wax biosynthesis                   | ko00073        | 6         | 20        |
| Glycosphingolipid biosynthesis                         | ko00604        | 5         | 12        |
| Lipoic acid metabolism                                 | ko00785        | 3         | 9         |
| Flavone and flavonol biosynthesis                      | ko00944        | 2         | 2         |
| Glucosinolate biosynthesis                             | ko00966        | 1         | 2         |
| Limonene and pinene degradation                        | ko00903        | 1         | 5         |

---
